# Supplementary material for: Immunotherapy using anti-PD-1 and anti-PD-L1 in Leishmania amazonensis-infected BALB/c mice reduce parasite load
Source: PubMed Central journal article supplement (PMC6937231; doi:10.1038/s41598-019-56336-8), 2019-12-30

## **Immunotherapy using anti-PD-1 and anti-PD-L1 in *Leishmania amazonensis*-infected BALB/c mice reduce parasite load.**

Alessandra M. da Fonseca-Martins, Tadeu D. Ramos, Juliana E.S. Pratti, Luan Firmino-Cruz, Daniel Claudio Oliveira Gomes, Lynn Soong, Elvira M. Saraiva, Herbert L. de Matos Guedes\*

\* Corresponding author: Herbert Leonel de Matos Guedes

E-mail: [herbert@biof.ufrj.br](mailto:herbert@biof.ufrj.br), [herbert@xerem.ufrj.br](mailto:herbert@xerem.ufrj.br), [herbert@ioc.fiocruz.br](mailto:herbert@ioc.fiocruz.br)

### **Supplementary Information:**

Supplementary Figure 1: Ineffectiveness of treatment with a weekly dose of specific antibodies.

Supplementary Figure 2: Unaltered lesion growth and control of parasite load from two weekly doses of specific antibodies.

Supplementary Figure 3: Control of parasite load from two weekly doses of specific antibodies.

Supplementary Figure 4: Effects of MoAb treatment on the specific anti-*Leishmania* immunoglobulins.

Supplementary Figure 5: Treg cells in *L. amazonensis*-infected BALB/c mice.

Supplementary Figure 6: Analyse of IFN- $\gamma$  production on CD3<sup>+</sup>CD4<sup>-</sup> CD8<sup>-</sup>.

Supplementary Figure 7: Analyse of IFN- $\gamma$ <sup>+</sup>PD-1<sup>+</sup> CD4<sup>-</sup> CD8<sup>-</sup> T cells after anti-PD-1 and anti-PD-L1 MoAb treatment.

Supplementary Figure 8: Strategy of gate of CD4 and CD8 T cells.

Supplementary Figure 9: Strategy of gate of PD-L1<sup>+</sup> CD11c<sup>+</sup>.

**Suppl. Fig. 1: Ineffectiveness of treatment with a weekly dose of specific antibodies.** Mice were infected in the footpad with *L. amazonensis* promastigotes ( $2 \times 10^6$ ) and treated with anti-PD-1, anti-PD-L1 or anti-PD-L2, all at a  $100 \mu\text{g}/\text{dose}$ , administered once a week intraperitoneally beginning at 7 days post-infection. (A) Progression of the lesion. (B) Parasite load. Data  $\pm$  SEM of individually mice (5 mice/group).

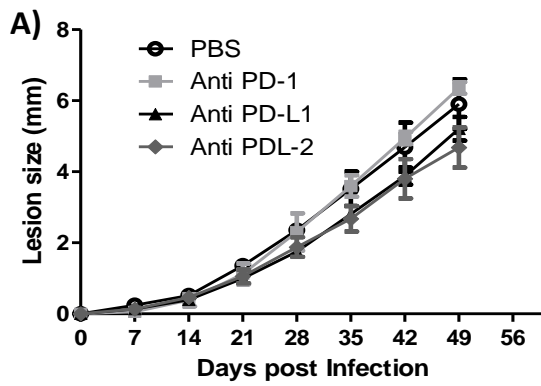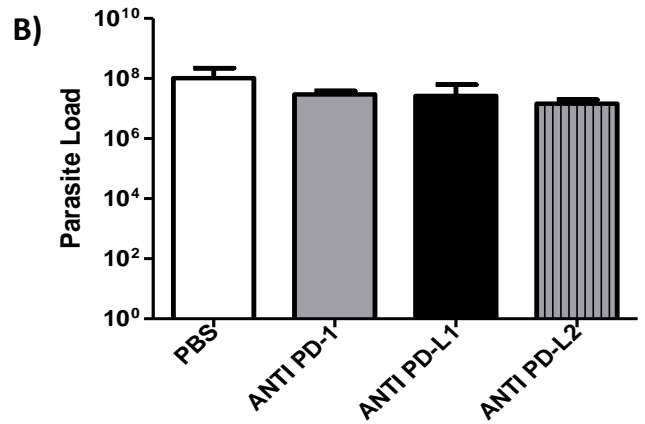

**Suppl. Fig. 2: Unaltered lesion growth and control of parasite load from two weekly doses of specific antibodies.** Mice were infected in the footpad with *L. amazonensis* promastigotes ( $2 \times 10^6$ ) and treated with anti-PD-1, anti-PD- L1 or anti-PD-L2, all at a 100  $\mu\text{g}/\text{dose}$ , administered twice per week intraperitoneally beginning at 7 days post-infection. (A) Progression of the lesion. (B) Parasite load of paw analyzed by limiting dilution. Data  $\pm$  SEM of individually mice (5 mice/group). \*\*\* $p < 0.0001$  (T Test).

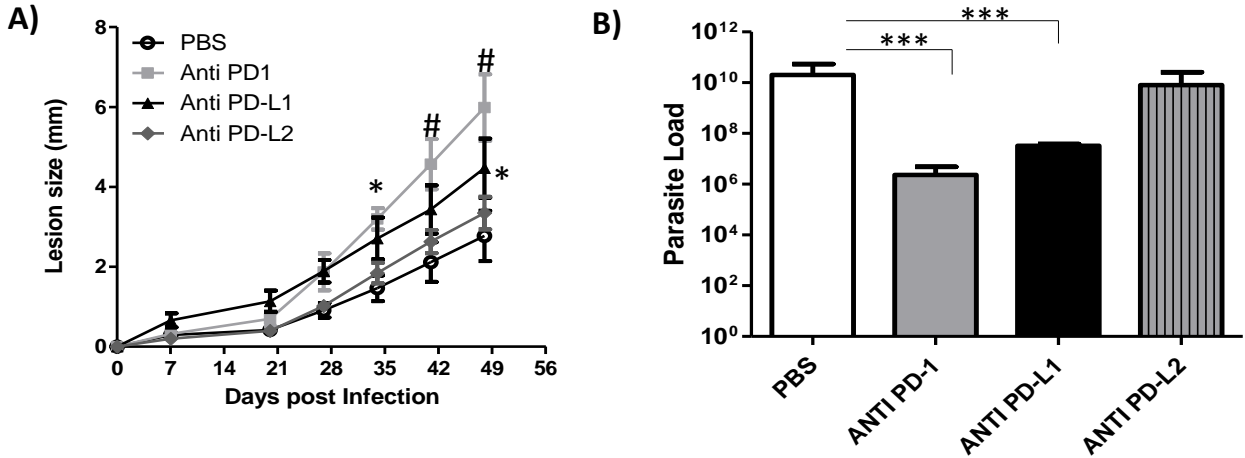

**Suppl. Fig. 3: Control of parasite load from two weekly doses of specific antibodies.** Mice were infected in the footpad with *L. amazonensis* promastigotes ( $2 \times 10^6$ ) and treated with anti-PD-1, anti-PD-L1, all at a  $100 \mu\text{g}/\text{dose}$ , administered twice per week intraperitoneally beginning at 7 days post-infection. (A) Parasite load of draining lymph node. (B) Parasite load of spleen. Data  $\pm$  SEM of individually mice (5 mice/group). \* $p < 0.05$ , \*\* $p < 0.0375$ . (T test (A) and Mann Whitney test. (B)).

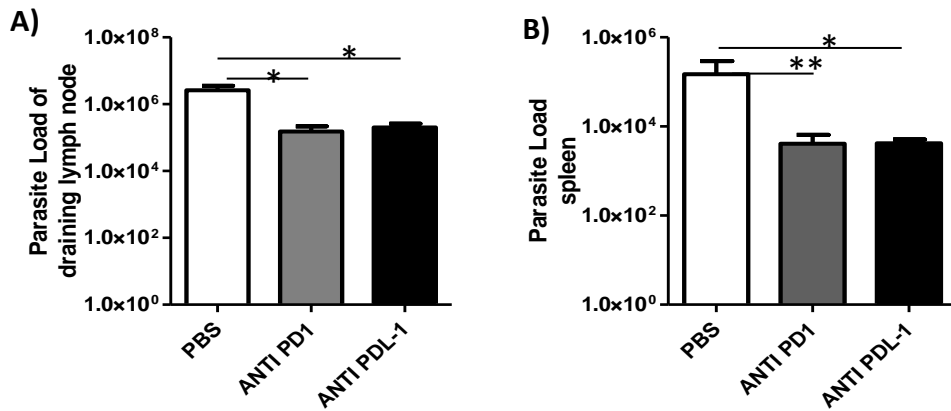

**Suppl. Fig. 4: Effects of MoAb treatment on the specific anti-*Leishmania* immunoglobulins.** (A) Specific IgM. (B) IgG. (C) IgG1. (D) IgG2a. Antibodies were detected in the serum (IgM, IgG and IgG1- diluted 1:500; IgG2a- diluted 1:40) of *L. amazonensis*-infected mice through ELISA using total *L. amazonensis* antigens (1  $\mu$ g/well). Animals were treated for 49 days with antibodies administered twice a week intraperitoneally, starting at 7 days post- infection. Data  $\pm$  SEM of individually mice (5 mice/group) are representative of two independent experiments producing the same result profile.

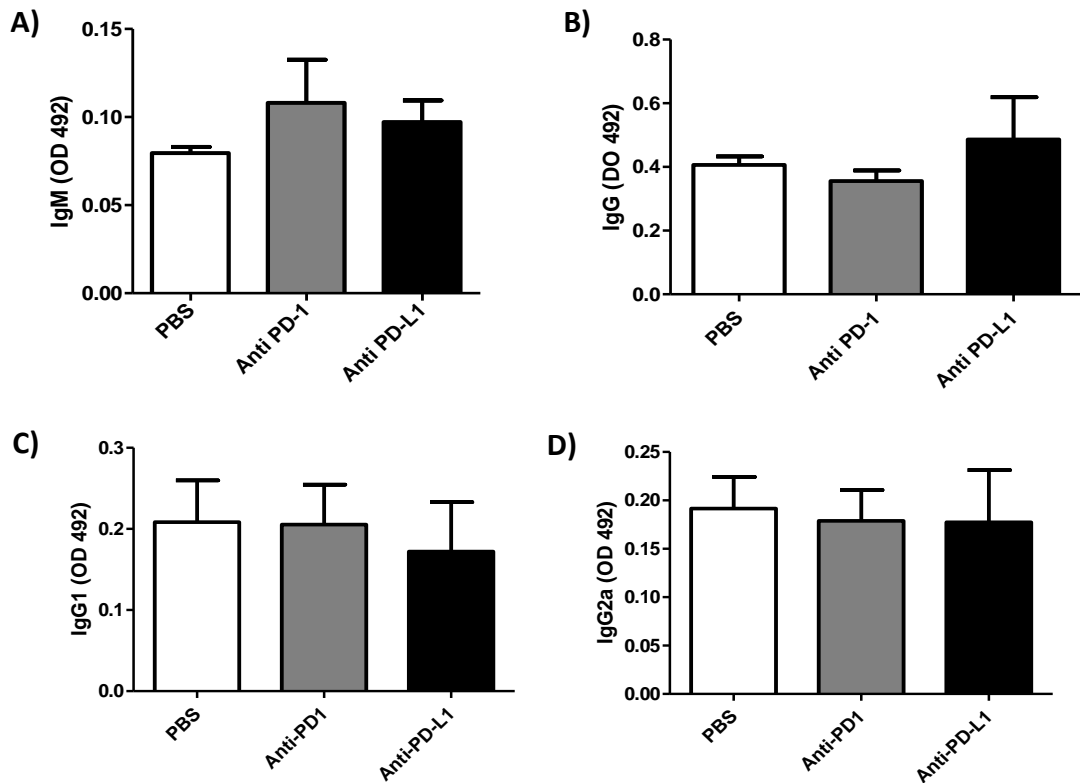

**Suppl. Fig. 5: Treg cells in *L. amazonensis*-infected BALB/c mice.** Mice were infected in the footpad with *L. amazonensis* promastigotes ( $2 \times 10^6$ ) and treated with anti-PD-1, anti-PD-L1 or anti-PD-L2, all at a 100  $\mu\text{g}/\text{dose}$  administered twice per week intraperitoneally beginning at 7 days post-infection. Naive mice were used as control. Percentage of Treg cells. Data  $\pm$  SEM of individually mice (5 mice/group) are representative of two independent experiments producing the same result profile.

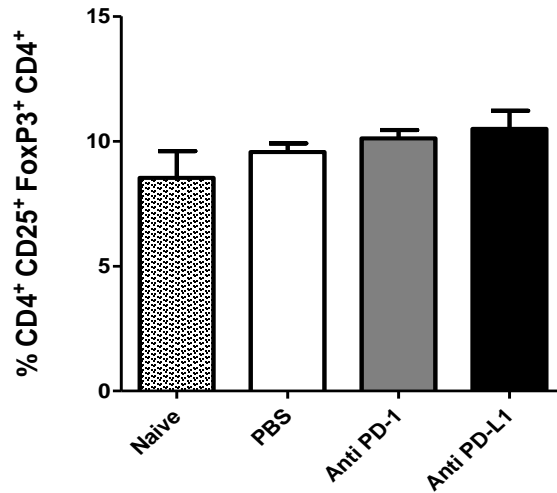

**Suppl. Fig. 6: Analyse of IFN- $\gamma$  production on CD3<sup>+</sup>CD4<sup>-</sup> CD8<sup>-</sup>.** Lymphocytes were collected from the popliteal lymph node of an *L. amazonensis*-infected paw after approximately 2 months of treatment with anti-PD-1 or anti-PD-L1, administered twice a week intraperitoneally beginning after 7 days of infection. (A) Percentage of CD4<sup>-</sup> CD8<sup>-</sup> T cells. (B) Number of CD4<sup>-</sup> CD8<sup>-</sup> T cells. (C) Dot plot of IFN- $\gamma$  expression (APC-IFN- $\gamma$ , SSC-A) . (D) Percentage of IFN- $\gamma$ <sup>+</sup> CD4<sup>-</sup> CD8<sup>-</sup> T cells. (E) Number of IFN- $\gamma$ <sup>+</sup> CD4<sup>-</sup> CD8<sup>-</sup> T cells. Naive = mice without infection and therapy, PBS = infected mice injected with PBS on treatment days, PD-1 = mice infected and treated with anti-PD-1 (100  $\mu$ g/dose), PD-L1 = mice infected and treated with anti-PD-L1 (100  $\mu$ g/dose). Data  $\pm$  SEM of individually mice (5 mice/group) are representative of two independent experiments producing the same result profile.

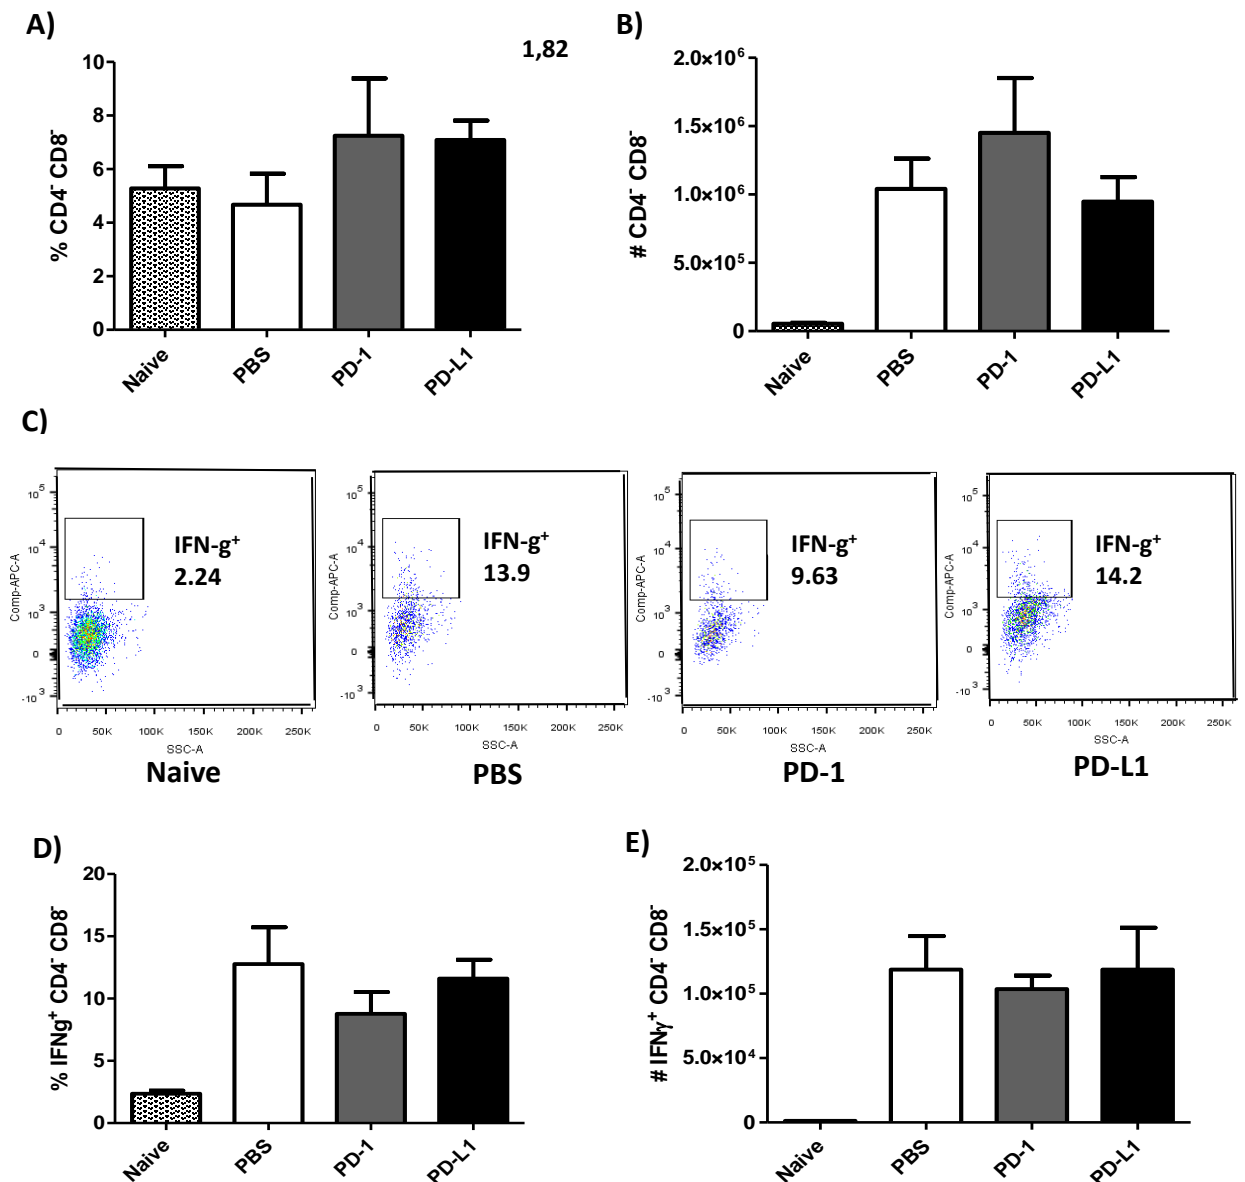

**Suppl. Fig. 7: Analysis of IFN- $\gamma$ <sup>+</sup>PD-1<sup>+</sup> CD4<sup>-</sup> CD8<sup>-</sup> T cells after anti-PD-1 and anti-PD-L1 MoAb treatment.** Lymphocytes were collected from the popliteal lymph node of an *L. amazonensis*-infected paw after approximately 2 months of treatment with anti-PD-1 or anti-PD-L1, administered twice a week intraperitoneally beginning after 7 days of infection. (A) Dot plot of IFN- $\gamma$  and PD-1 expression (APC-IFN- $\gamma$ , PE-Cy7-PD-1). (B) Percentage of IFN- $\gamma$ <sup>+</sup> PD-1<sup>-</sup> CD4<sup>-</sup> CD8<sup>-</sup> T cells. (C) Number of IFN- $\gamma$ <sup>+</sup>PD-1<sup>-</sup>CD4<sup>-</sup> CD8<sup>-</sup> T cells. (D) Percentage of IFN- $\gamma$ <sup>-</sup>PD-1<sup>+</sup> CD4<sup>-</sup> CD8<sup>-</sup> T cells. (E) Number of IFN- $\gamma$ <sup>-</sup>PD-1<sup>+</sup> CD4<sup>-</sup> CD8<sup>-</sup> T cells. (F) Percentage of IFN- $\gamma$ <sup>+</sup>PD-1<sup>+</sup> CD4<sup>-</sup> CD8<sup>-</sup> T cells. (G) Number of IFN- $\gamma$ <sup>+</sup>PD-1<sup>+</sup> CD4<sup>-</sup> CD8<sup>-</sup> T cells. Naive = mice without infection and therapy, PBS = infected mice injected with PBS on treatment days, PD-1 = mice infected and treated with anti-PD-1 (100  $\mu$ g/dose), PD-L1 = mice infected and treated with anti-PD-L1 (100  $\mu$ g/dose). Data  $\pm$  SEM of individually mice (5 mice/group) are representative of two independent experiments producing the same result profile.

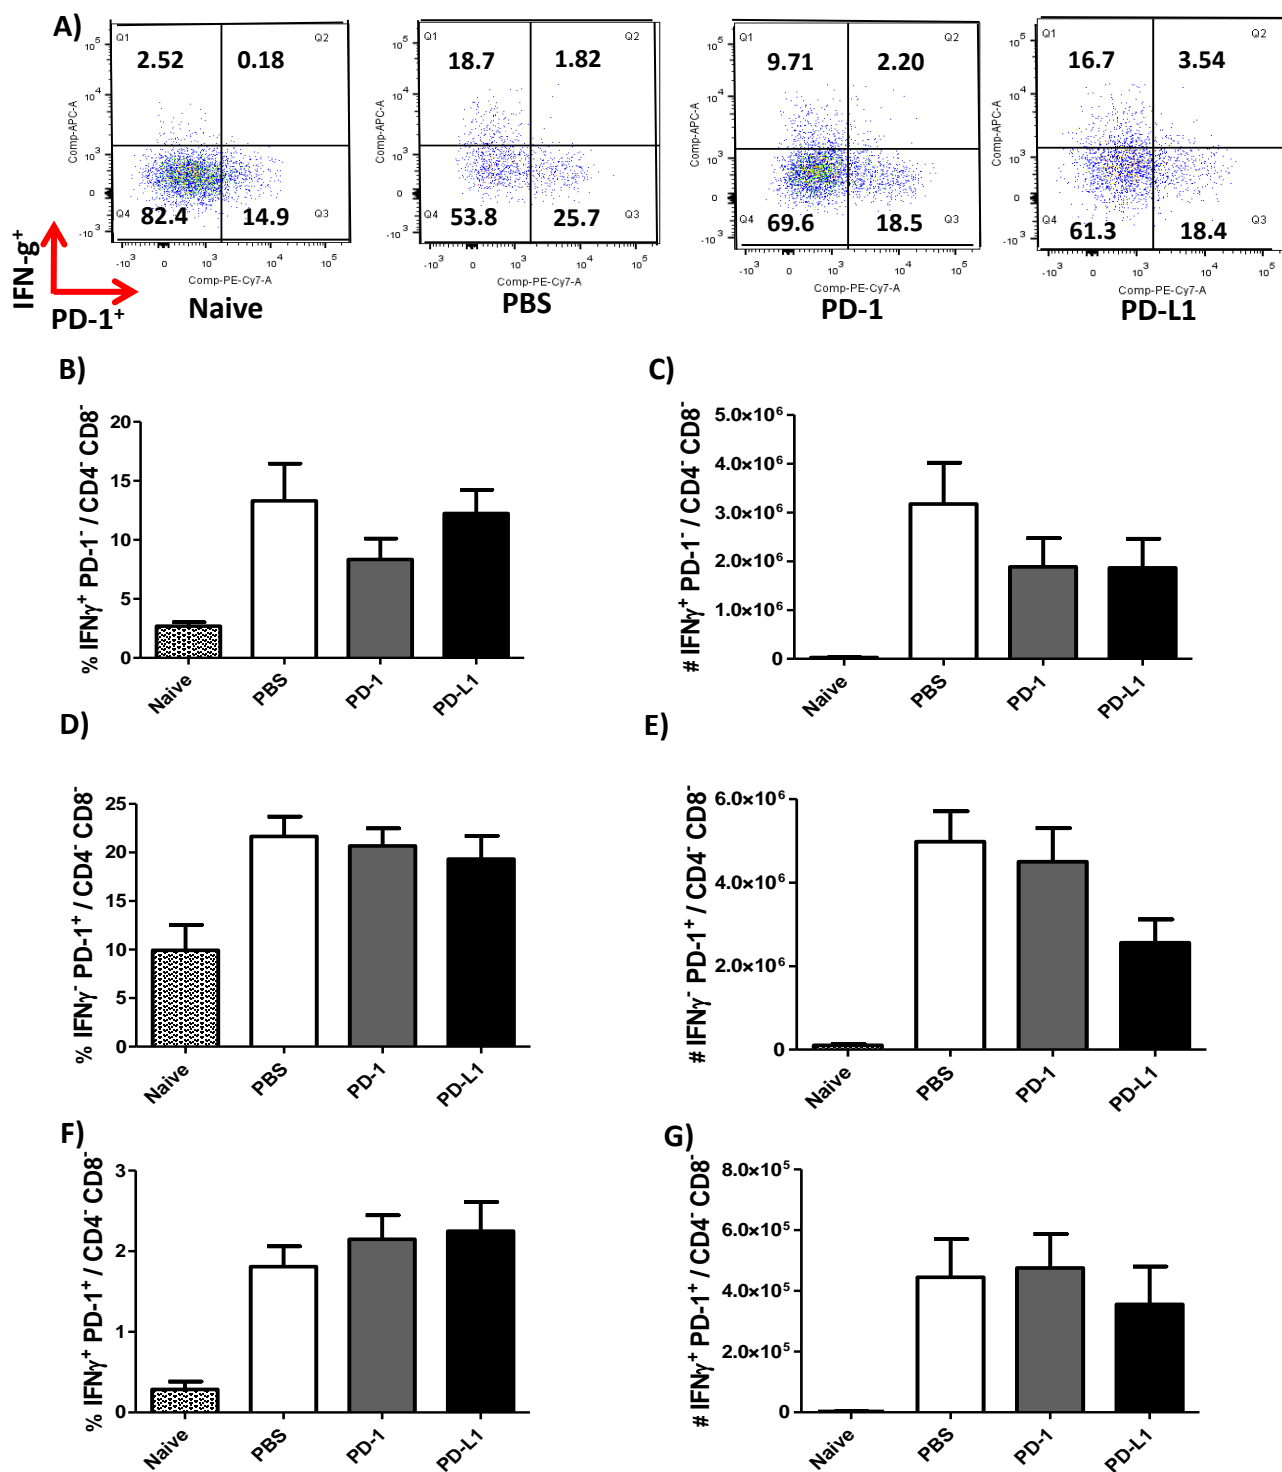



**Suppl. Fig. 8: Strategy of gate of CD4 and CD8 T cells.** (A) Lymphocytes- FSC x SSC. (B) Single cells- FSC-A x FSC-H. (c) CD3<sup>+</sup>-APC cy7 x FSC-H. (D) CD8<sup>+</sup>CD3<sup>+</sup>-PerCP x CD4<sup>+</sup>CD3<sup>+</sup>-PE cy7 x DN- double negative. (E) IFN- $\gamma$ - APC x PD-1- FITC . (F) IFN- $\gamma$ - APC x FSC-A.

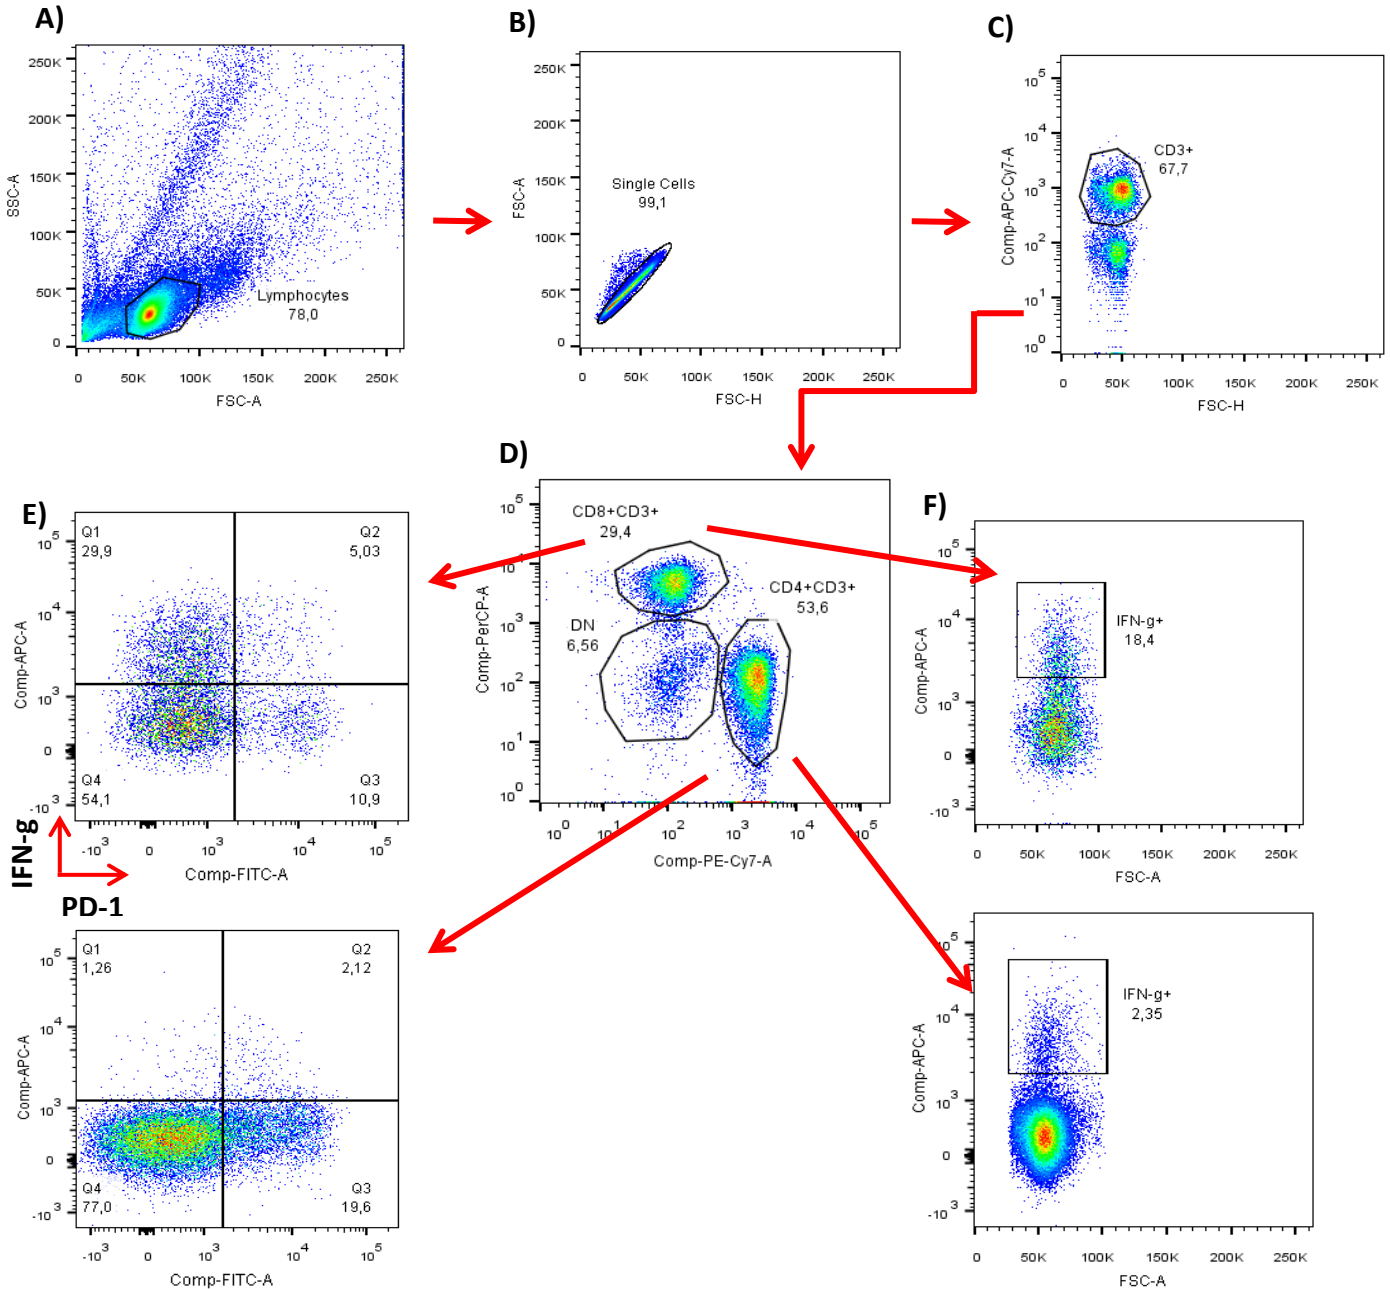

**Suppl. Fig. 9: Strategy of gate of PD-L1<sup>+</sup> CD11c<sup>+</sup>.** (A) Cells- FSC x SSC. (B) Single cells- FSC-A x FSC-H. (c) CD11c<sup>+</sup>- PerCP x SSC-H. (D) Histogram of PD-L1 expression. Red= negative of PD-L1, Blue= naïve and Orange= PD-L1<sup>+</sup> (APC-PD-L1).

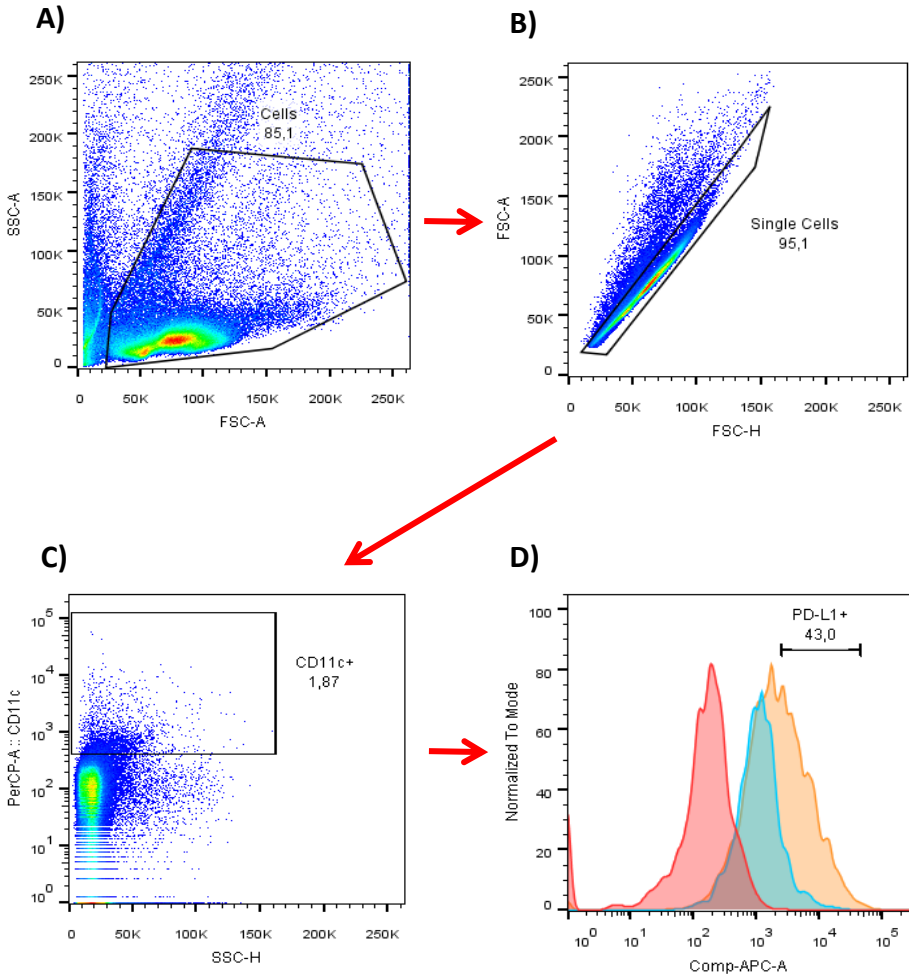

Supplement: 41598_2019_56336_MOESM1_ESM.pdf [file 41598_2019_56336_MOESM1_ESM.pdf]
